# Supplementary material for: Polyoxometalate based ionic crystal: dual applications in selective colorimetric sensor for hydrated ZnCl2 and antimicrobial activity
Source: Royal Society of Chemistry journal article supplement (doi:10.1039/d1nj00138h), 2021-01-01
Supplement: d1nj00138h1.pdf [file d1nj00138h1.pdf]

## Polyoxometalate Based Ionic Crystal: Dual Applications in Selective Colorimetric Sensor for hydrated $ZnCl_2$ and Antimicrobial Activity

C. Sabarinathan<sup>a</sup>, M. Karthikeyan<sup>b</sup>, R.M. Murugappan<sup>b\*</sup>, Savarimuthu Philip Anthony<sup>c</sup>,  
Bhaskaran Shankar<sup>d</sup>, Kannabiran Parthasarathy<sup>e</sup>, T. Arumuganathan<sup>a\*</sup>

<sup>a</sup>PG & Research Department of Chemistry, Thiagarajar College, Madurai-625 009, India

<sup>b</sup>Department of Zoology and Microbiology, Thiagarajar College, Madurai-625 009, India

<sup>c</sup>School of Chemical & Biotechnology, SASTRA Deemed University, Thanjavur- 613 401, India

<sup>d</sup>Department of Chemistry, Sethu Institute of Technology, Kariapatti-626 115, India

<sup>e</sup>Animal & Mineral Origin Drug Research Laboratory (AMDRL), Siddha Central Research Institute, Arignar Anna Hospital Campus, Arumbakkam, Chennai-600 106, India

<sup>a</sup>Corresponding author E-mail id: arumuganathan\_chem@tcarts.in

<sup>b</sup>Corresponding author E-mail id: cmmbmak@gmail.com

### SUPPORTING INFORMATION –FIGURE

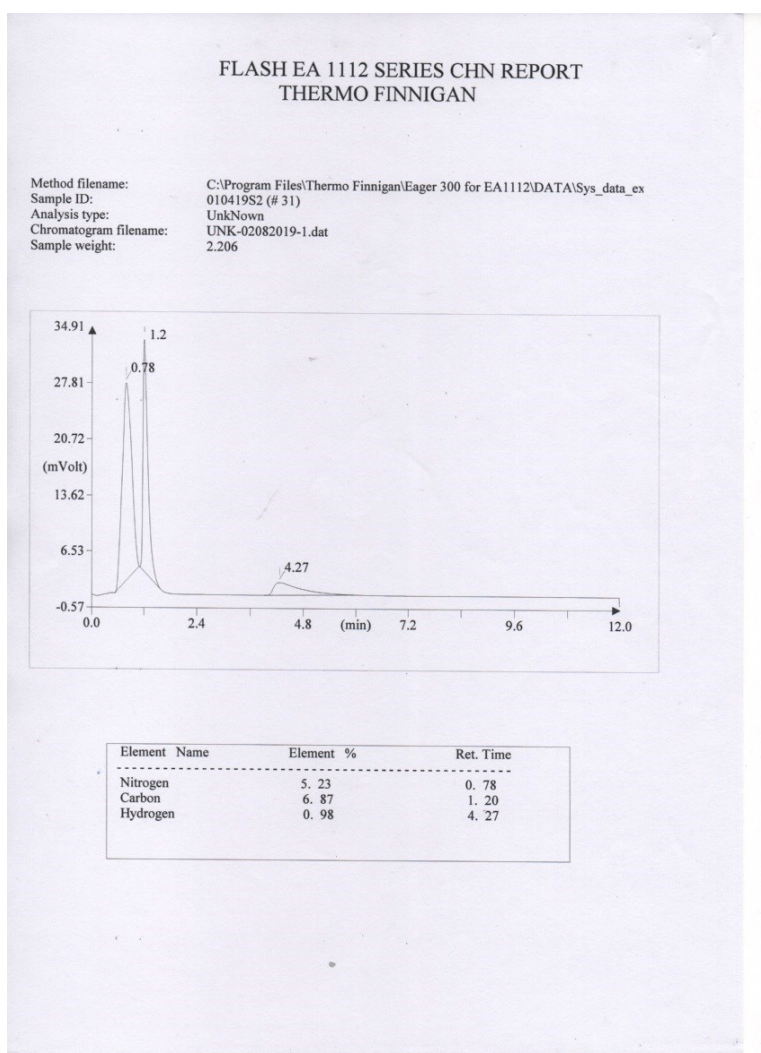

**SI-Fig. 1** Elemental Analysis of POM-Salt (1).
